# Supplementary material
Source: PubMed Central journal article supplement (PMC4249046)
Supplement: AEM.01998-14_zam999105765so1.pdf [file AEM.01998-14_zam999105765so1.pdf]

## Supplemental material

### Table S1

Primers and PCR conditions used in this study.

| Target                      | Primer                 | Sequence (5'-3')                    | Annealing temperature (°C) | Reference |
|-----------------------------|------------------------|-------------------------------------|----------------------------|-----------|
| <i>bla</i> <sub>CTX</sub>   | CTX-consensus primer F | GCA GYA CCA GTA ARG TKA TGG C       | 58                         | 1         |
|                             | CTX consensus primer R | ATC ACK CGG RTC GCC XGG RAT         |                            |           |
| <i>bla</i> <sub>OXA</sub>   | <i>bla</i> OXA- F      | ACC AGA TTC AAC TTT CAA             | 55                         | 2         |
|                             | <i>bla</i> OXA- R      | TCT TGG CTT TTA TGC TTG             |                            |           |
| <i>bla</i> <sub>TEM</sub>   | <i>bla</i> TEM- F      | TCG GGG AAA TGT GCG                 | 50                         | 3         |
|                             | <i>bla</i> TEM- R      | GGA ATA AGG GCG ACA                 |                            |           |
| <i>bla</i> <sub>SHV-1</sub> | <i>bla</i> SHV- F      | TGA TTT ATC TGC GGG ATA CG          | 55                         | 3         |
|                             | <i>bla</i> SHV- R      | TTA GCG TTG CCA GTG CTC G           |                            |           |
| <i>tet</i> (A)              | <i>tet</i> A-F         | GCT ACA TCC TGC TTG CCT TC          | 55                         | 4         |
|                             | <i>tet</i> A-R         | CAT AGA TCG CCG TGA AGA GG          |                            |           |
| <i>tet</i> (B)              | <i>tet</i> B-F         | TTG GTT AGG GGC AAG TTT TG          | 55                         | 4         |
|                             | <i>tet</i> B-R         | GTA ATG GGC CAA TAA CAC CG          |                            |           |
| <i>tet</i> (O)              | <i>tet</i> O-F         | AAC TTA GGC ATT CTG GCT CAC         | 55                         | 4         |
|                             | <i>tet</i> O-R         | TCC CAC TGT TCC ATA TCG TCA         |                            |           |
| <i>tet</i> (Q)              | <i>tet</i> Q-F         | TTA TAC TTC CTC CGG CAT CG          | 55                         | 4         |
|                             | <i>tet</i> Q-R         | ATC GGT TCG AGA ATG TCC AC          |                            |           |
| <i>catA1</i>                | <i>catA1</i> - F       | CGC CTG ATG AAT GCT CAT CCG         | 58                         | 2         |
|                             | <i>cat A1</i> - R      | CCT GCC ACT CAT CGC AGT AC          |                            |           |
| <i>catA2</i>                | <i>catA2</i> - F       | ATG AAT TTT ACC AGA ATT GAT CTG AA  | 58                         | 2         |
|                             | <i>catA2</i> - R       | ATT TCA GTA TGT TAT CAC ACA TCA TCT |                            |           |
| <i>cat A3</i>               | <i>catA3</i> - F       | AAA TTG GGT TCG CCG TGA             | 58                         | 2         |
|                             | <i>catA3</i> - R       | ATT TAC TGT TAC ACA ACT CTT GTA GCC |                            |           |
| <i>catB3</i>                | <i>catB3</i> - F       | TCA AAG GCA AGC TGC TTT CTG AGC     | 58                         | 2         |
|                             | <i>catB3</i> - R       | TAT TAG ACG AGC ACA GCA TGG GCA     |                            |           |
| <i>ermA</i>                 | <i>ermA1</i>           | TCT AAA AAG CAT GTA AAA GAA         | 52                         | 5         |
|                             | <i>ermA2</i>           | CTT CGA TAG TTT ATT AAT ATT AGT     |                            |           |
| <i>ermB</i>                 | <i>ermB1</i>           | GAA AAG GTA CTC AAC CAA ATA         | 52                         | 5         |
|                             | <i>ermB2</i>           | AGT AAC GGT ACT TAA ATT GTT TAC     |                            |           |
| <i>mefA</i>                 | <i>mefA</i> - F        | AGT ATC ATT AAT CAC TAG TGC         | 55                         | 5         |
|                             | <i>mefA</i> - R        | TTC TTC TGG TAC TAA AAG TGG         |                            |           |
| <i>ereA</i>                 | <i>EreA</i> - F        | AACACCCTGAACCCAAGGGACG              | 55                         | 5         |
|                             | <i>EreA</i> - R        | CTTCACATCCGGATTCGCTCGA              |                            |           |
| <i>ereB</i>                 | <i>EreB</i> - F        | CATATAATCATCACCAATGGCA              | 55                         | 5         |
|                             | <i>EreB</i> - R        | AGAAATGGAGGTTTCATACTTACCA           |                            |           |

|                               |                                                        |                                                                     |    |    |
|-------------------------------|--------------------------------------------------------|---------------------------------------------------------------------|----|----|
| <i>msrA</i>                   | msrA- F<br>msrA- R                                     | GGCACAATAAGAGTGTTTAAAGG<br>AAGTTATATCATGAATAGATTGTCCTGTT            | 50 | 6  |
| <i>msrB</i>                   | msrB- F<br>msrB- R                                     | TATGATATCCATAATAATTATCCAATC<br>AAGTTATATCATGAATAGATTGTCCTGTT        | 50 | 6  |
| <i>aadE</i>                   | aadE I<br>aadE II                                      | GCAGAACAGGATGAACGTATTCG<br>ATCAGTCGGAACCTATGTCCC                    | 55 | 7  |
| <i>aphA3</i>                  | aphA3- F<br>aphA3- R                                   | GGG ACC ACC TAT GAT GTG GAA CG<br>CAG GCT TGA TCC CCA GTA AGT C     | 58 | 2  |
| <i>aac(6')-Ie-aph(2'')-Ia</i> | aac(6')-Ie-aph(2'')-Ia- F<br>aac(6')-Ie-aph(2'')-Ia- R | CAGAGCCTTGGGAAGATGAAG<br>CCTCGTGTAATTCATGTTCTGGC                    | 55 | 8  |
| <i>aph(2'')-Ib</i>            | aph(2'')-Ib- F<br>aph(2'')-Ib- R                       | CTTGGACGCTGAGATATATGAGCAC<br>GTTTGTAGCAATTCAGAAACACCCTT             | 55 | 8  |
| <i>aph(2'')-Ic</i>            | aph(2'')-Ic- F<br>aph(2'')-Ic- R                       | CCACAATGATAATGACTCAGTTCCC<br>CCACAGCTTCCGATAGCAAGAG                 | 55 | 8  |
| <i>aph(2'')-Id</i>            | aph(2'')-Id- F<br>aph(2'')-Id- R                       | GTGGTTTTTACAGGAATGCCATC<br>CCCTCTTCATACCAATCCATATAACC               | 55 | 8  |
| <i>aph(3')-IIIa</i>           | aph(3')-IIIa- F<br>aph(3')-IIIa- R                     | GGCTAAAATGAGAATATCACCGG<br>CTTTAAAAAATCATAACAGCTCGCG                | 55 | 8  |
| <i>ant(4')-Ia</i>             | ant(4')-Ia- F<br>ant(4')-Ia- R                         | CAAACCTGCTAAATCGGTAGAAGCC<br>GGAAAGTTGACCAGACATTACGAACT             | 55 | 8  |
| <i>sul-I</i>                  | sulI- F<br>sulI- R                                     | CGCACCGGAAACATCGCTGCAC<br>TGAAGTTCGCCGCAAGGCTCG                     | 56 | 9  |
| <i>sulII</i>                  | sulII- F<br>sulII- R                                   | TCC GGT GGA GGC CGG TAT CTG G<br>CGG GAA TGC CAT CTG CCT TGA G      | 61 | 9  |
| <i>sulIII</i>                 | sulIII- F<br>sulIII- R                                 | TCC GTT CAG CGA ATT GGT GCA G<br>TTC GTT CAC GCC TTA CAC CAG C      | 60 | 9  |
| <i>vanA</i>                   | vanA- F<br>vanA- R                                     | GCT ATT CAG CTG TAC TC<br>CAG CGG CCA TCA TAC GG                    | 52 | 2  |
| <i>vanB</i>                   | vanB- F<br>vanB- R                                     | CAT CGC CGT CCC CGA ATT TCA AA<br>GAT GCG GAA GAT ACC GTG GCT       | 58 | 2  |
| <i>dfrA</i>                   | dfrA1<br>dfrA2                                         | CTTTTCTACGCACTAAATGTAAG<br>CATTATCAATAATTGTCGCTCAC                  | 50 | 10 |
| <i>dfrD</i>                   | dfrD1<br>dfrD2                                         | GGAAGGGCTTTACCTGACAGAAG<br>CGACATAAGGCAAGAACATAACATA                | 50 | 10 |
| <i>rpoB</i>                   | rpoB- P5<br>rpoB- P6                                   | TGATCAACGCCAAGCCGGT<br>TTGCGCTCCATGCCGGTAC                          | 55 | 11 |
| <i>acrA</i>                   | acrA- F<br>acrA- R                                     | CTC TCA GGC AGC TTA GCC CTA A<br>TGC AGA GGT TCA GTT TTG ACT GTT    | 60 | 12 |
| <i>acrB</i>                   | acrB- F<br>acrB- R                                     | GGT CGA TTC CGT TCT CCG TTA<br>CTA CCT GGA AGT AAA CGT CAT TGG<br>T | 60 | 12 |
| <i>tolC</i>                   | tolC- F<br>tolC- R                                     | AAG CCG AAA AAC GCA ACC T<br>CAG AGT CGG TAA GTG ACC ATC            | 57 | 12 |

|                   |        |                               |    |    |
|-------------------|--------|-------------------------------|----|----|
| <i>mexB</i>       | MxB- U | CAA GGG CGT CGG TGA CTT CCA G | 62 | 13 |
|                   | MxB- L | ACC TGG GAA CCG TCG GGA TTG A |    |    |
| <i>mexY</i>       | MxY- U | GGA CCA CGC CGA AAC CGA ACG   | 62 | 13 |
|                   | MxY- L | CGC CGC AAC TGA CCC GCT ACA   |    |    |
| <i>mexD</i>       | MxD- U | GGA GTT CGG CCA GGT AGT GCT G | 62 | 13 |
|                   | MxD- L | ACT GCA TGT CCT CGG GGA AGA A |    |    |
| <i>Int- 1,2,3</i> | hep35  | TGC GGG TYA ARG ATB TKG ATT T | 55 | 14 |
|                   | hep 36 | CAR CAC ATG CGT RTA RAT       |    |    |
| Class             | 2      | intl2L                        | 63 | 15 |
| integron          |        | intl2R                        |    |    |
| Class             | 3      | intl3L                        | 63 | 15 |
| integron          |        | intl3R                        |    |    |

## References

1. **Birkett C, Ludlam H, Woodford N, Brown D, Brown N, Roberts M, Milner N, Curran M.** 2007. Real-time TaqMan PCR for rapid detection and typing of genes encoding CTX-M extended-spectrum  $\beta$ -lactamases. *J. Med. Microbiol.* 56:52-55.
2. **Kim M, Kwon TH, Jung SM, Cho SH, Jin SY, Park NH, Kim CG, Kim JS.** 2013. Antibiotic Resistance of Bacteria Isolated from the Internal Organs of Edible Snow Crabs. *PLoS One.* 8:e70887.
3. **Knapp CW, Zhang W, Sturm BS, Graham DW.** 2010. Differential fate of erythromycin and beta-lactam resistance genes from swine lagoon waste under different aquatic conditions. *Environ. Pollut.* 158:1506-12.
4. **Ng L-K, Martin I, Alfo M, Mulvey M.** 2001. Multiplex PCR for the detection of tetracycline resistance genes. *Mol. Cell. Probes* 15:209–215.
5. **Sutcliffe J, Grebe T, Tait-Kamradt A, Wondrack L.** 1996. Detection of erythromycin-resistant determinants by PCR. *Antimicrob. Agents Chemother.* 40:2562–2566.
6. **Lina G, Quaglia A, Reverdy M-E, Leclercq R, Vandenesch F, Etienne J.** 1999. Distribution of genes encoding resistance to macrolides, lincosamides, and streptogramins among staphylococci. *Antimicrob Agents Chemother.* 43:1062–1066.
7. **Klare I, Konstabel C, Werner G, Huys G, Vankerckhoven V, Kahlmeter G, Hildebrandt B, Müller-Bertling S, Witte W, Goossens H.** 2007. Antimicrobial susceptibilities of *Lactobacillus*, *Pediococcus* and *Lactococcus* human isolates and cultures intended for probiotic or nutritional use. *J. Antimicrob. Chemother.* 59:900–912.
8. **Vakulenko SB, Donabedian SM, Voskresenskiy AM, Zervos MJ, Lerner SA, Chow JW.** 2003. Multiplex PCR for detection of aminoglycoside resistance genes in enterococci. *Antimicrob. Agents Chemother.* 47:1423e1426.
9. **Pei R, Kim S-C, Carlson KH, Pruden A.** 2006. Effect of river landscape on the sediment concentrations of antibiotics and corresponding antibiotic resistance genes (ARG). *Water Res.* 40:2427-2435.
10. **Liu C, Zhang ZY, Dong K, Yuan JP, Guo XK.** 2009. Antibiotic resistance of probiotic strains of lactic acid bacteria isolated from marketed foods and drugs. *Biomed. Environ. Sci.* 22:401–412.

11. **Hosokawa K, Park N-H, Inaoka T, Itoh Y, Ochi K.** 2002. Streptomycin-resistant (*rpsL*) or rifampicin-resistant (*rpoB*) mutation in *Pseudomonas putida* KH146-2 confers enhanced tolerance to organic chemicals. *Environ. Microbiol.* **4**:703–712.
12. **Swick MC, Morgan-Linnell SK, Carlson KM, Zechiedrich L.** 2011. Expression of multidrug efflux pump genes *acrAB-tolC*, *mdfA*, and *norE* in *Escherichia coli* clinical isolates as a function of fluoroquinolone and multidrug resistance. *Antimicrob. Agents Chemother.* **55**:921–924.
13. **Oh H, Stenhoff J, Jalal S, Wretling B.** 2003. Role of Efflux Pumps and Mutations in Genes for Topoisomerases II and IV in Fluoroquinolone-Resistant *Pseudomonas aeruginosa* Strains. *Microb. drug Resis.* **9**:323-328.
14. **White PA, McIver CJ, Deng YM, Rawlinson WD.** 2000. Characterisation of two new gene cassettes, *aadA5* and *dfrA17*. *FEMS Microbiol. Lett.* **182**:265-269.
15. **Ploy MC, Denis F, Courvalin P, Lambert T.** 2000. Molecular characterization of integrons in *Acinetobacter baumannii*: description of an hybrid class 2 integron. *Antimicrob. Agents Chemother.* **44**:2684-2688.

**A**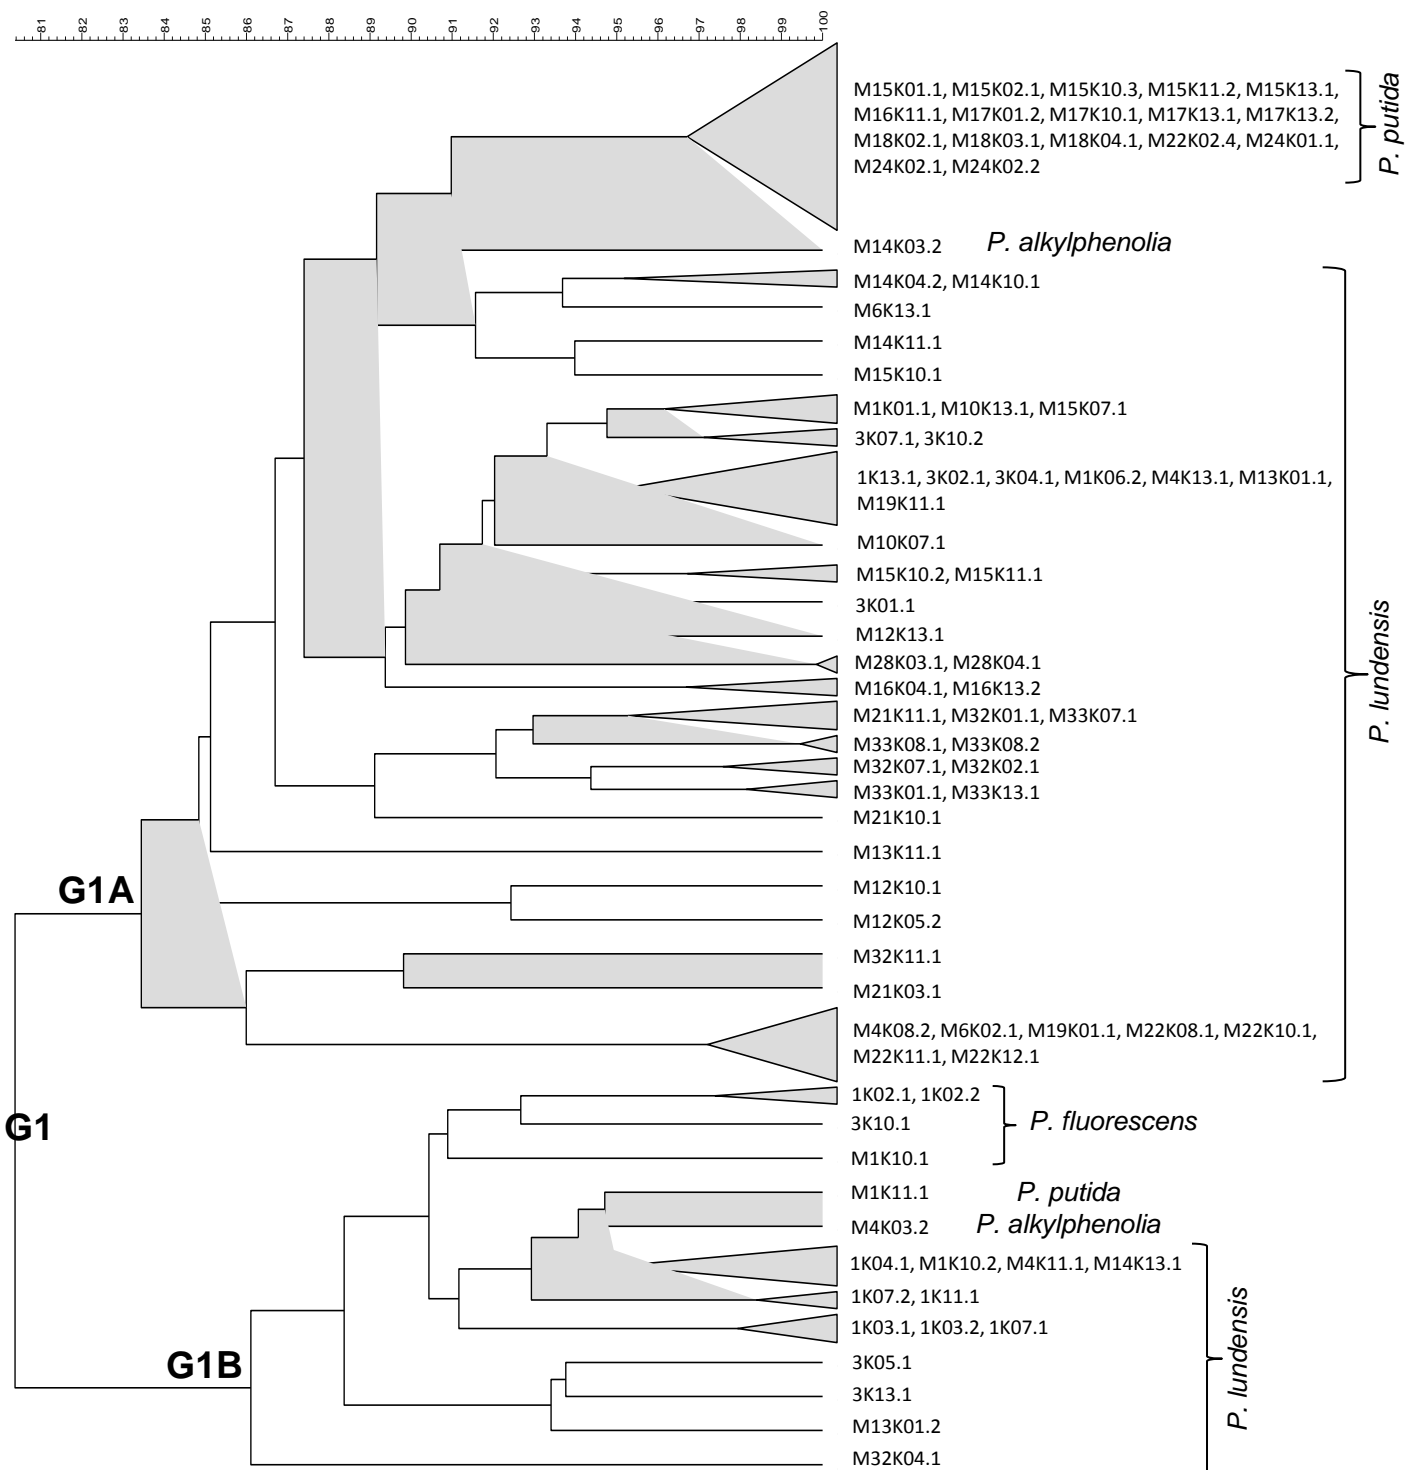

**B**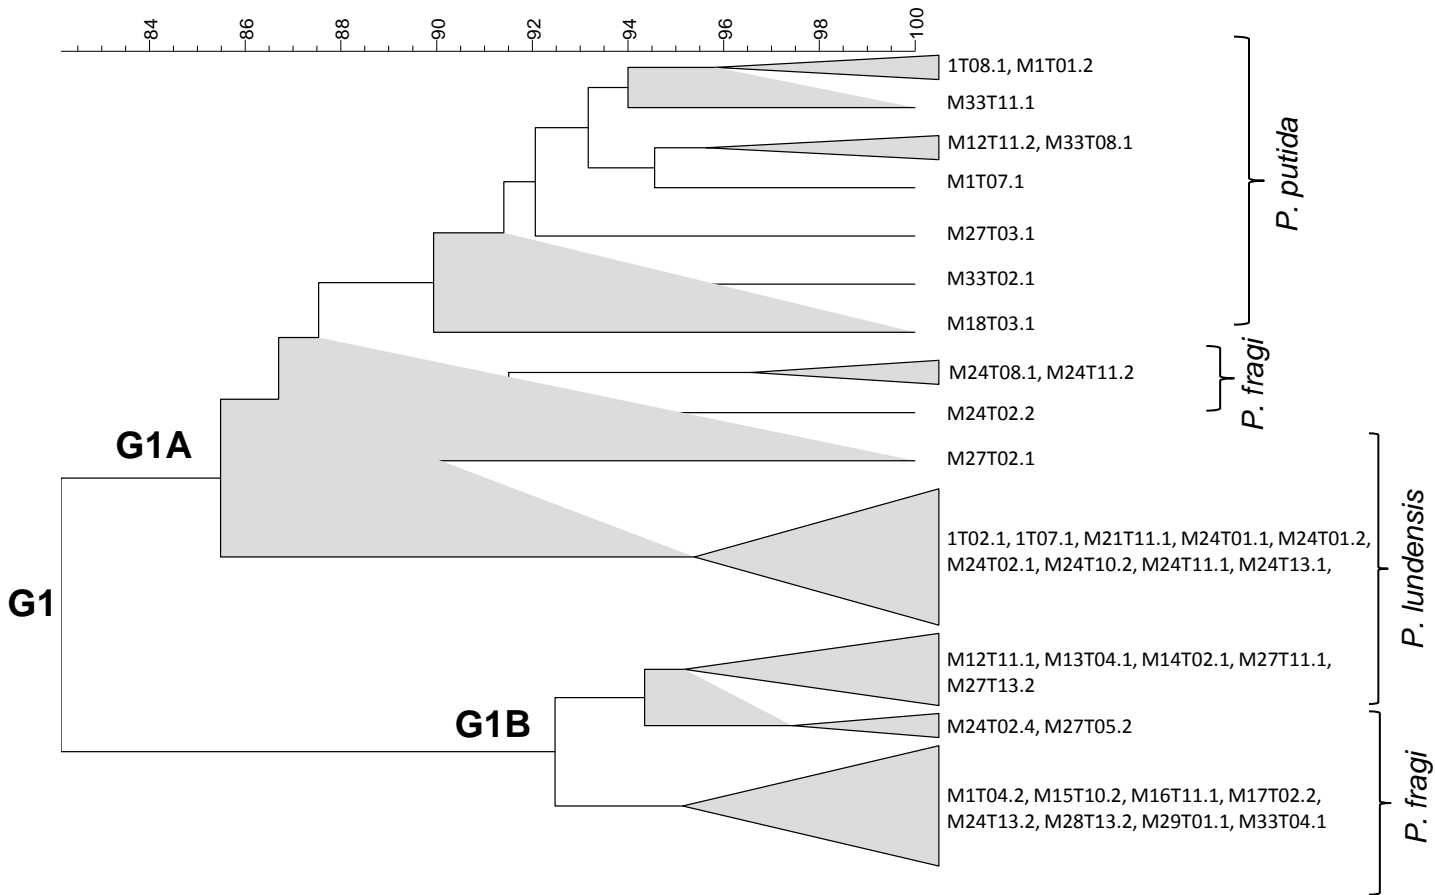

**Fig. S1.** Dendrograms obtained from ERIC-PCR fingerprints of mesophilic (A) and psychrotrophic (B) pseudomonads isolated from slaughterhouse surfaces throughout meat chain production and from the end products. Patterns were grouped with the unweighted pair group algorithm with arithmetic averages (UPGMA). Species identity is indicated on the right-hand side of the dendrogram.
